# Supplementary material
Source: publisher figshare collection journal article supplement (https://future-science-group.figshare.com/ndownloader/files/28657965)
Supplement: Supplementary file 1 [file 28657965]

Supplementary Table 1

Primer sequence for qRT-PCR:

| Gene name | Sequence |
| --- | --- |
| Mmu Xist | F:5ʹ-GTCAGCAAGAGCCTTGAATTG-3ʹ;  R: 5ʹ- TTTGCTGAGTCTTGAGGAGAATC-3ʹ |
| Mmu miR-590-3p | F: 5ʹ-GGCCCGTGGTAATTTTATGTATA-3ʹ  R:5ʹ-GTGTCGTGGAGTCGGCAATTC-3ʹ |
| Mmu Tgif2 | F:5ʹ-TCGGAAGGATGGCAAAGACC-3ʹ  R:5ʹ-AGCACACAGACAAGGAGAGC-3ʹ |
| Mmu U6 | F:5ʹ-CGCTTCACGAATTTGCGTGTCAT-3ʹ  R:5ʹ-GCTTCGGCACATATACTAAAAT-3ʹ |
| Mmu β-actin | F:5ʹ-TATAAAACCCGGCGGCGCA-3ʹ  R:5ʹ-CGCAGCGATATCGTCATCCA-3ʹ |
